# Supplementary material for: Rabbit IgG-imprinted nanoMIPs by solid phase synthesis: the effect of cross-linkers on their affinity and selectivity
Source: Royal Society of Chemistry journal article supplement (doi:10.1039/d2tb00245k), 2022-01-01

## Rabbit IgG-imprinted nanoMIPs by solid phase synthesis: Effect of cross-linker on affinity and selectivity

Matteo Chiarello, Laura Anfossi, Simone Cavalera, Fabio Di Nardo, Thea Serra, Fabrizio Sordello and Claudio Baggiani

### Electronic Supplementary Information

1 - Binding isotherms for RIgG, BIgG, BSA and LZM on RIgG-imprinted (nanoMIP) nanoparticles. Red circles: RIgG, blue

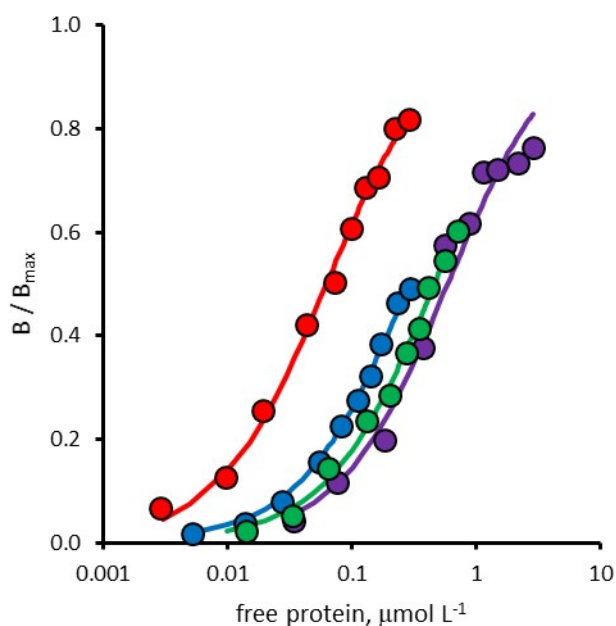

circles: BIgG, green circles: BSA, violet circles: LZM

#### nanoMIP\_BIS\_RIgG

| $r^2$        | Coef Det    | DF          | Adj $r^2$    | Fit Std Err           | F-value      |         |
|--------------|-------------|-------------|--------------|-----------------------|--------------|---------|
| 0.9955609421 |             |             | 0.9942926398 | 0.0266516688          | 1794.1841934 |         |
| Parm         | Value       | Std Error   | t-value      | 95% Confidence Limits |              | P> t    |
| Bmax         | 1.377274791 | 0.037683061 | 36.54891001  | 1.290377497           | 1.464172084  | 0.00000 |
| Keq          | 16.01832692 | 1.292868444 | 12.38975782  | 13.03696694           | 18.99968689  | 0.00000 |

#### nanoMIP\_BIS\_BIgG

| $r^2$        | Coef Det    | DF          | Adj $r^2$    | Fit Std Err           | F-value      |         |
|--------------|-------------|-------------|--------------|-----------------------|--------------|---------|
| 0.9958961573 |             |             | 0.9947236308 | 0.0232580876          | 1941.3924663 |         |
| Parm         | Value       | Std Error   | t-value      | 95% Confidence Limits |              | P> t    |
| Bmax         | 1.990924515 | 0.148410199 | 13.41501142  | 1.648689983           | 2.333159047  | 0.00000 |
| Keq          | 3.495325414 | 0.425948327 | 8.205984614  | 2.513086813           | 4.477564016  | 0.00004 |

#### nanoMIP\_BIS\_BSA

| $r^2$        | Coef Det    | DF          | Adj $r^2$    | Fit Std Err           | F-value      |         |
|--------------|-------------|-------------|--------------|-----------------------|--------------|---------|
| 0.9944750936 |             |             | 0.9928965489 | 0.0159539286          | 1439.9883215 |         |
| Parm         | Value       | Std Error   | t-value      | 95% Confidence Limits |              | P> t    |
| Bmax         | 0.995934195 | 0.062710797 | 15.88138323  | 0.851322838           | 1.140545551  | 0.00000 |
| Keq          | 2.169608406 | 0.257557033 | 8.423797932  | 1.575680822           | 2.763535990  | 0.00003 |

#### nanoMIP\_BIS\_LZM

| $r^2$        | Coef Det    | DF          | Adj $r^2$    | Fit Std Err           | F-value      |         |
|--------------|-------------|-------------|--------------|-----------------------|--------------|---------|
| 0.9710010189 |             |             | 0.9627155957 | 1.0657038121          | 267.87176134 |         |
| Parm         | Value       | Std Error   | t-value      | 95% Confidence Limits |              | P> t    |
| Bmax         | 21.13218042 | 1.454638384 | 14.52744589  | 17.77777829           | 24.48658254  | 0.00000 |

Keq 1.697361228 0.340091057 4.990902268 0.913109845 2.481612612 0.00106

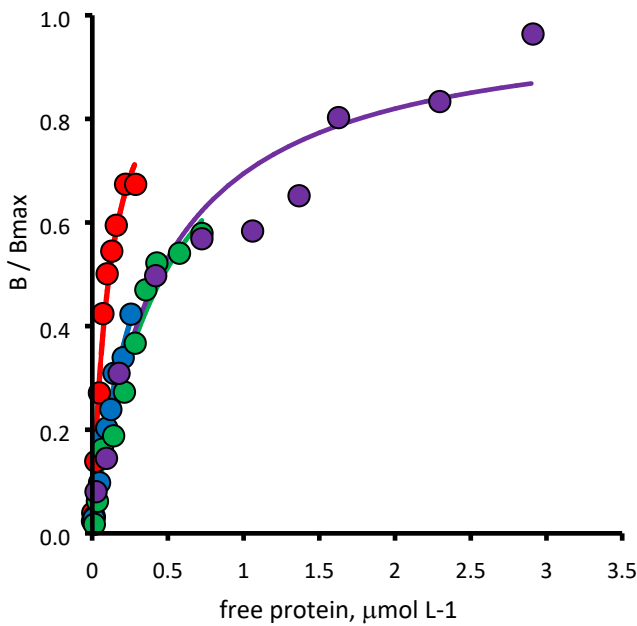

nanoMIP\_EDAM\_RlgG

| r <sup>2</sup> Coef Det | DF Adj r <sup>2</sup> | Fit Std Err  | F-value      | 95% Confidence Limits |             | P> t    |
|-------------------------|-----------------------|--------------|--------------|-----------------------|-------------|---------|
| 0.9761590939            | 0.9693474065          | 0.0700554202 | 327.55771651 |                       |             |         |
| Parm                    | Value                 | Std Error    | t-value      | 95% Confidence Limits |             | P> t    |
| Bmax                    | 1.702104253           | 0.161851791  | 10.51643757  | 1.328873355           | 2.075335152 | 0.00001 |
| Keq                     | 8.811099464           | 1.893651688  | 4.652967343  | 4.444330846           | 13.17786808 | 0.00164 |

nanoMIP\_EDAM\_BlgG

| r <sup>2</sup> Coef Det | DF Adj r <sup>2</sup> | Fit Std Err  | F-value      | 95% Confidence Limits |             | P> t    |
|-------------------------|-----------------------|--------------|--------------|-----------------------|-------------|---------|
| 0.9863991244            | 0.9818654992          | 0.0349002073 | 507.67274786 |                       |             |         |
| Parm                    | Value                 | Std Error    | t-value      | 95% Confidence Limits |             | P> t    |
| Bmax                    | 1.985686402           | 0.327403270  | 6.064955929  | 1.211500692           | 2.759872113 | 0.00051 |
| Keq                     | 3.287018725           | 0.820978999  | 4.003779302  | 1.345711876           | 5.228325573 | 0.00517 |

nanoMIP\_EDAM\_BSA

| r <sup>2</sup> Coef Det | DF Adj r <sup>2</sup> | Fit Std Err  | F-value      | 95% Confidence Limits |             | P> t    |
|-------------------------|-----------------------|--------------|--------------|-----------------------|-------------|---------|
| 0.9749714545            | 0.9678204415          | 0.0395049369 | 311.63503394 |                       |             |         |
| Parm                    | Value                 | Std Error    | t-value      | 95% Confidence Limits |             | P> t    |
| Bmax                    | 1.140833240           | 0.155569288  | 7.333280588  | 0.782089819           | 1.499576661 | 0.00008 |
| Keq                     | 2.106018704           | 0.541369205  | 3.890170853  | 0.857619079           | 3.354418329 | 0.00461 |

nanoMIP\_EDAM\_LZM

| r <sup>2</sup> Coef Det | DF Adj r <sup>2</sup> | Fit Std Err  | F-value      | 95% Confidence Limits |             | P> t    |
|-------------------------|-----------------------|--------------|--------------|-----------------------|-------------|---------|
| 0.9475420646            | 0.9325540831          | 0.9436922435 | 144.50314267 |                       |             |         |
| Parm                    | Value                 | Std Error    | t-value      | 95% Confidence Limits |             | P> t    |
| Bmax                    | 13.25958780           | 1.021490057  | 12.98063325  | 10.90402751           | 15.61514810 | 0.00000 |
| Keq                     | 2.273551724           | 0.611126169  | 3.720265699  | 0.864292253           | 3.682811195 | 0.00587 |

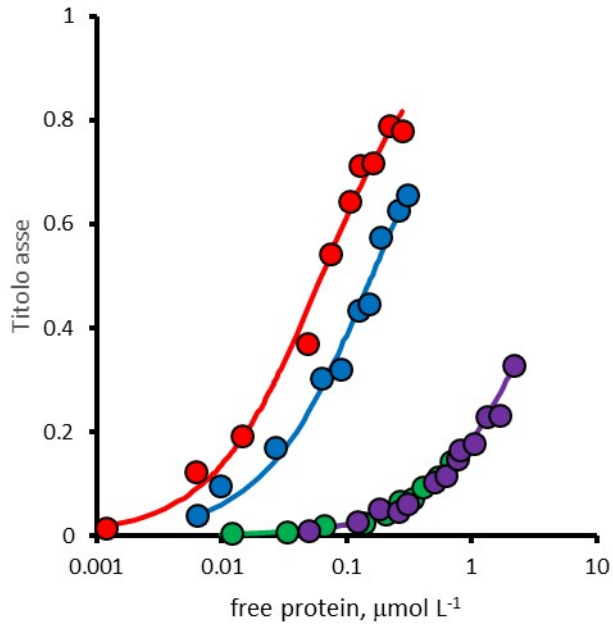

#### nanoMIP\_NOBE\_RlgG

| $r^2$ Coef Det | DF Adj $r^2$ | Fit Std Err  | F-value      | 95% Confidence Limits |             | P> t    |
|----------------|--------------|--------------|--------------|-----------------------|-------------|---------|
| 0.9878146269   | 0.9843330918 | 0.0505354209 | 648.52483204 |                       |             |         |
| Parm           | Value        | Std Error    | t-value      | 95% Confidence Limits |             | P> t    |
| Bmax           | 1.484379463  | 0.076725657  | 19.34658533  | 1.307449781           | 1.661309144 | 0.00000 |
| Keq            | 15.88673540  | 2.461783227  | 6.453344563  | 10.20985311           | 21.56361770 | 0.00020 |

#### nanoMIP\_NOBE\_BlgG

| $r^2$ Coef Det | DF Adj $r^2$ | Fit Std Err  | F-value      | 95% Confidence Limits |             | P> t    |
|----------------|--------------|--------------|--------------|-----------------------|-------------|---------|
| 0.9919092583   | 0.9892123444 | 0.0409593544 | 858.18644139 |                       |             |         |
| Parm           | Value        | Std Error    | t-value      | 95% Confidence Limits |             | P> t    |
| Bmax           | 1.541653355  | 0.069518336  | 22.17621191  | 1.377268611           | 1.706038098 | 0.00000 |
| Keq            | 12.74992867  | 1.522981118  | 8.371691886  | 9.148650587           | 16.35120675 | 0.00007 |

#### nanoMIP\_NOBE\_BSA

| $r^2$ Coef Det | DF Adj $r^2$ | Fit Std Err  | F-value      | 95% Confidence Limits |             | P> t    |
|----------------|--------------|--------------|--------------|-----------------------|-------------|---------|
| 0.9861087447   | 0.9821398146 | 0.1732938812 | 567.90187741 |                       |             |         |
| Parm           | Value        | Std Error    | t-value      | 95% Confidence Limits |             | P> t    |
| Bmax           | 16.02085425  | 6.240091583  | 2.567406910  | 1.631177274           | 30.41053123 | 0.03326 |
| Keq            | 0.577523519  | 0.276923781  | 2.085496297  | -0.06106386           | 1.216110902 | 0.07051 |

#### nanoMIP\_NOBE\_LZM

| $r^2$ Coef Det | DF Adj $r^2$ | Fit Std Err  | F-value      | 95% Confidence Limits |             | P> t    |
|----------------|--------------|--------------|--------------|-----------------------|-------------|---------|
| 0.9817980198   | 0.9781576237 | 0.5718387295 | 593.32985091 |                       |             |         |
| Parm           | Value        | Std Error    | t-value      | 95% Confidence Limits |             | P> t    |
| Bmax           | 43.02060181  | 9.573777589  | 4.493586927  | 21.94885940           | 64.09234423 | 0.00091 |
| Keq            | 0.223681210  | 0.065173962  | 3.432064040  | 0.080234288           | 0.367128133 | 0.00560 |

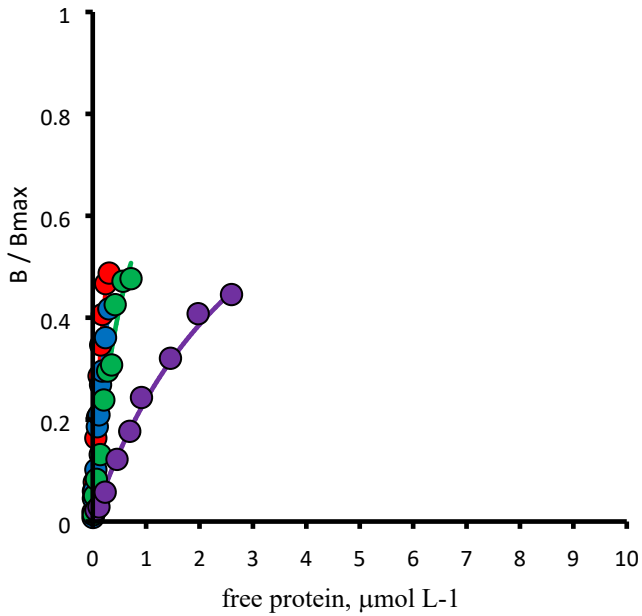

#### nanoMIP\_EDMA\_RIgG

| $r^2$        | Coef Det    | DF | Adj $r^2$    | Fit Std Err  | F-value               |             |         |
|--------------|-------------|----|--------------|--------------|-----------------------|-------------|---------|
| 0.9892292702 |             |    | 0.9861519189 | 0.0236228046 | 734.75375669          |             |         |
| Parm         | Value       |    | Std Error    | t-value      | 95% Confidence Limits |             | P> t    |
| Bmax         | 1.244664039 |    | 0.147343530  | 8.447361340  | 0.904889250           | 1.584438828 | 0.00003 |
| Keq          | 3.388792639 |    | 0.660409848  | 5.131347826  | 1.865884800           | 4.911700478 | 0.00089 |

#### nanoMIP\_EDMA\_BlgG

| $r^2$        | Coef Det    | DF | Adj $r^2$    | Fit Std Err  | F-value               |             |         |
|--------------|-------------|----|--------------|--------------|-----------------------|-------------|---------|
| 0.9932427726 |             |    | 0.9913121363 | 0.0224960081 | 1175.9175424          |             |         |
| Parm         | Value       |    | Std Error    | t-value      | 95% Confidence Limits |             | P> t    |
| Bmax         | 1.843398159 |    | 0.233889627  | 7.881487459  | 1.304047713           | 2.382748604 | 0.00005 |
| Keq          | 2.367787795 |    | 0.441527923  | 5.362713600  | 1.349622581           | 3.385953010 | 0.00068 |

#### nanoMIP\_EDMA\_BSA

| $r^2$        | Coef Det    | DF | Adj $r^2$    | Fit Std Err  | F-value               |             |         |
|--------------|-------------|----|--------------|--------------|-----------------------|-------------|---------|
| 0.9768346405 |             |    | 0.9702159664 | 0.0505196448 | 337.34322678          |             |         |
| Parm         | Value       |    | Std Error    | t-value      | 95% Confidence Limits |             | P> t    |
| Bmax         | 1.793187328 |    | 0.321457904  | 5.578295964  | 1.051904073           | 2.534470583 | 0.00052 |
| Keq          | 1.436263381 |    | 0.422091589  | 3.402729215  | 0.462918433           | 2.409608330 | 0.00932 |

#### nanoMIP\_EDMA\_LZM

| $r^2$        | Coef Det    | DF | Adj $r^2$    | Fit Std Err  | F-value               |             |         |
|--------------|-------------|----|--------------|--------------|-----------------------|-------------|---------|
| 0.9940061562 |             |    | 0.9920082083 | 0.6680323468 | 1160.8649363          |             |         |
| Parm         | Value       |    | Std Error    | t-value      | 95% Confidence Limits |             | P> t    |
| Bmax         | 50.10489384 |    | 5.926054478  | 8.455017419  | 36.09200173           | 64.11778595 | 0.00006 |
| Keq          | 0.315123536 |    | 0.057408067  | 5.489185630  | 0.179375029           | 0.450872043 | 0.00092 |

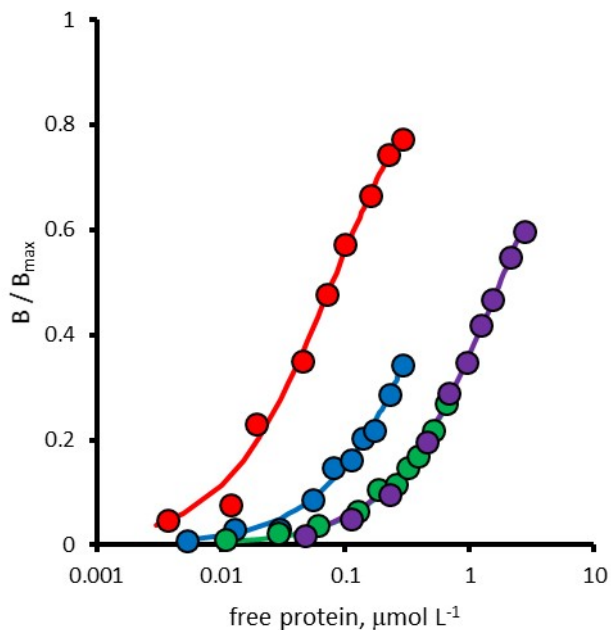

nanoMIP\_GDMA\_RIgG

| r <sup>2</sup> | Coef Det    | DF | Adj r <sup>2</sup> | Fit Std Err  | F-value      | 95% Confidence Limits |  | P> t    |
|----------------|-------------|----|--------------------|--------------|--------------|-----------------------|--|---------|
| 0.9919092583   |             |    | 0.9892123444       | 0.0409593544 | 858.18644139 |                       |  |         |
| Parm           | Value       |    | Std Error          | t-value      |              |                       |  |         |
| Bmax           | 1.541653355 |    | 0.069518336        | 22.17621191  | 1.377268611  | 1.706038098           |  | 0.00000 |
| Keq            | 12.74992867 |    | 1.522981118        | 8.371691886  | 9.148650587  | 16.35120675           |  | 0.00007 |

nanoMIP\_GDMA\_BlgG

| r <sup>2</sup> | Coef Det    | DF | Adj r <sup>2</sup> | Fit Std Err  | F-value      | 95% Confidence Limits |  | P> t    |
|----------------|-------------|----|--------------------|--------------|--------------|-----------------------|--|---------|
| 0.9897824381   |             |    | 0.9868631347       | 0.0412233005 | 774.96565061 |                       |  |         |
| Parm           | Value       |    | Std Error          | t-value      |              |                       |  |         |
| Bmax           | 3.389852076 |    | 0.711088070        | 4.767133943  | 1.750080047  | 5.029624104           |  | 0.00141 |
| Keq            | 1.779035815 |    | 0.503076050        | 3.536315862  | 0.618940365  | 2.939131264           |  | 0.00766 |

nanoMIP\_GDMA\_BSA

| r <sup>2</sup> | Coef Det    | DF | Adj r <sup>2</sup> | Fit Std Err  | F-value      | 95% Confidence Limits |  | P> t    |
|----------------|-------------|----|--------------------|--------------|--------------|-----------------------|--|---------|
| 0.9936525051   |             |    | 0.9918389352       | 0.0722714346 | 1252.3397328 |                       |  |         |
| Parm           | Value       |    | Std Error          | t-value      |              |                       |  |         |
| Bmax           | 9.937853368 |    | 2.209129290        | 4.498538594  | 4.843592097  | 15.03211464           |  | 0.00201 |
| Keq            | 0.556319023 |    | 0.154933782        | 3.590688972  | 0.199041081  | 0.913596965           |  | 0.00708 |

nanoMIP\_GDMA\_LZM

| r <sup>2</sup> | Coef Det    | DF | Adj r <sup>2</sup> | Fit Std Err  | F-value      | 95% Confidence Limits |  | P> t    |
|----------------|-------------|----|--------------------|--------------|--------------|-----------------------|--|---------|
| 0.9976828314   |             |    | 0.9970207832       | 0.3358295725 | 3444.4893313 |                       |  |         |
| Parm           | Value       |    | Std Error          | t-value      |              |                       |  |         |
| Bmax           | 31.63808539 |    | 1.292211017        | 24.48368338  | 28.65824145  | 34.61792934           |  | 0.00000 |
| Keq            | 0.568918263 |    | 0.043635104        | 13.03808641  | 0.468295532  | 0.669540994           |  | 0.00000 |

2 - Binding isotherms for RIgG, BIgG, BSA and LZM on not-imprinted (nanoNIP) nanoparticles. Red circles: RIgG, blue circles: BIgG, green circles: BSA, violet circles: LZM

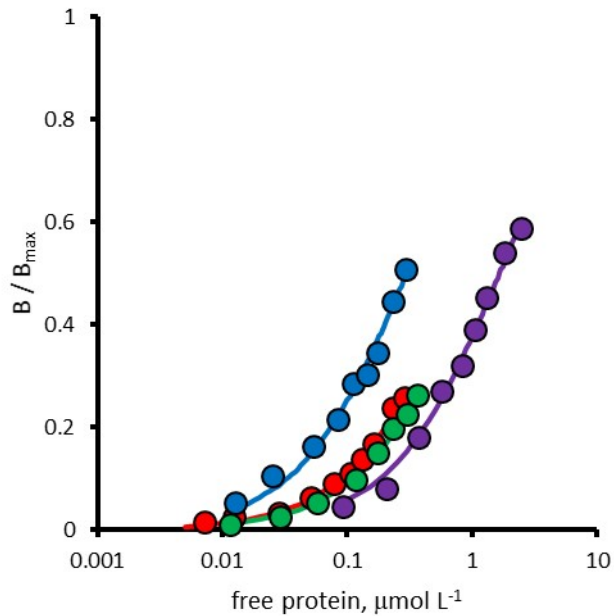

**nanoNIP\_BIS\_RIgG**

| $r^2$        | Coef Det    | DF Adj $r^2$ | Fit Std Err  | F-value               |             |         |
|--------------|-------------|--------------|--------------|-----------------------|-------------|---------|
| 0.9935973540 |             | 0.9917680266 | 0.0369947660 | 1241.4834254          |             |         |
| Parm         | Value       | Std Error    | t-value      | 95% Confidence Limits |             | P> t    |
| Bmax         | 5.069455517 | 1.108395511  | 4.573688242  | 2.513490888           | 7.625420146 | 0.00182 |
| Keq          | 1.252268357 | 0.343045520  | 3.650443701  | 0.461203971           | 2.043332743 | 0.00649 |

**nanoNIP\_BIS\_BIgG**

| $r^2$        | Coef Det    | DF Adj $r^2$ | Fit Std Err  | F-value               |             |         |
|--------------|-------------|--------------|--------------|-----------------------|-------------|---------|
| 0.9876433743 |             | 0.9835244990 | 0.0346859740 | 559.49769511          |             |         |
| Parm         | Value       | Std Error    | t-value      | 95% Confidence Limits |             | P> t    |
| Bmax         | 1.924113293 | 0.233641727  | 8.235315314  | 1.371638400           | 2.476588186 | 0.00008 |
| Keq          | 3.368604667 | 0.663191218  | 5.079386725  | 1.800406633           | 4.936802700 | 0.00143 |

**nanoNIP\_BIS\_BSA**

| $r^2$        | Coef Det    | DF Adj $r^2$ | Fit Std Err  | F-value               |             |         |
|--------------|-------------|--------------|--------------|-----------------------|-------------|---------|
| 0.9975763069 |             | 0.9966068297 | 0.0432321291 | 2469.5609699          |             |         |
| Parm         | Value       | Std Error    | t-value      | 95% Confidence Limits |             | P> t    |
| Bmax         | 8.486546696 | 1.453566767  | 5.838429228  | 4.929796950           | 12.04329644 | 0.00111 |
| Keq          | 0.993919092 | 0.216320151  | 4.594667158  | 0.464602752           | 1.523235432 | 0.00371 |

**nanoNIP\_BIS\_LZM**

| $r^2$        | Coef Det    | DF Adj $r^2$ | Fit Std Err  | F-value               |             |         |
|--------------|-------------|--------------|--------------|-----------------------|-------------|---------|
| 0.9935844413 |             | 0.9914459217 | 0.7378115771 | 1084.0974891          |             |         |
| Parm         | Value       | Std Error    | t-value      | 95% Confidence Limits |             | P> t    |
| Bmax         | 44.69705654 | 3.044432725  | 14.68157144  | 37.49811710           | 51.89599599 | 0.00000 |
| Keq          | 0.603678649 | 0.075235226  | 8.023883030  | 0.425775611           | 0.781581688 | 0.00009 |

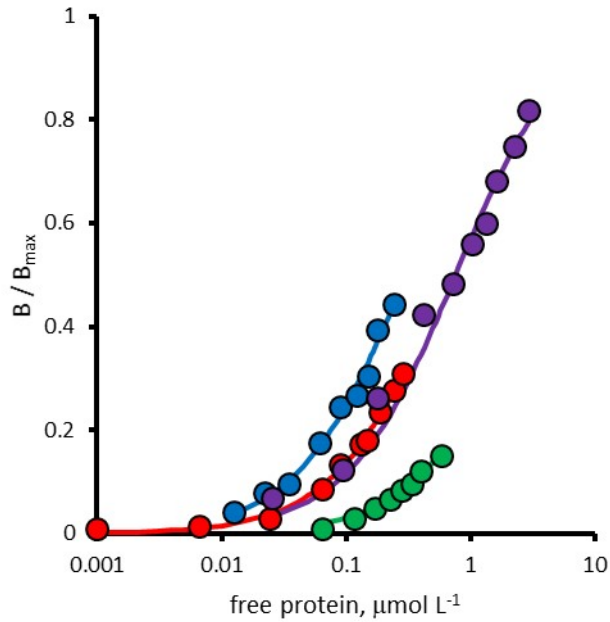

nanoNIP\_EDAM\_RlgG

| $r^2$ Coef Det | DF Adj $r^2$ | Fit Std Err  | F-value      | 95% Confidence Limits |             | P> t    |
|----------------|--------------|--------------|--------------|-----------------------|-------------|---------|
| 0.9955676899   | 0.9943013156 | 0.0188442886 | 1796.9278612 |                       |             |         |
| Parm           | Value        | Std Error    | t-value      | 95% Confidence Limits |             | P> t    |
| Bmax           | 2.437163837  | 0.394927532  | 6.171167211  | 1.526459316           | 3.347868358 | 0.00027 |
| Keq            | 1.578896042  | 0.338466660  | 4.664849537  | 0.798390526           | 2.359401559 | 0.00161 |

nanoNIP\_EDAM\_BlgG

| $r^2$ Coef Det | DF Adj $r^2$ | Fit Std Err  | F-value      | 95% Confidence Limits |             | P> t    |
|----------------|--------------|--------------|--------------|-----------------------|-------------|---------|
| 0.9804659178   | 0.9739545571 | 0.0938042065 | 351.34803645 |                       |             |         |
| Parm           | Value        | Std Error    | t-value      | 95% Confidence Limits |             | P> t    |
| Bmax           | 4.533775210  | 1.019175807  | 4.448472166  | 2.123807384           | 6.943743036 | 0.00298 |
| Keq            | 2.750418717  | 0.907280224  | 3.031498585  | 0.605041899           | 4.895795535 | 0.01907 |

nanoNIP\_EDAM\_BSA

| $r^2$ Coef Det | DF Adj $r^2$ | Fit Std Err  | F-value      | 95% Confidence Limits |             | P> t    |
|----------------|--------------|--------------|--------------|-----------------------|-------------|---------|
| 0.9848813275   | 0.9788338585 | 0.1793349335 | 390.86024087 |                       |             |         |
| Parm           | Value        | Std Error    | t-value      | 95% Confidence Limits |             | P> t    |
| Bmax           | 28.60319290  | 17.52565758  | 1.632075303  | -14.2805463           | 71.48693211 | 0.15378 |
| Keq            | 0.318584116  | 0.220544101  | 1.444537009  | -0.22106786           | 0.858236090 | 0.19871 |

nanoNIP\_EDAM\_LZM

| $r^2$ Coef Det | DF Adj $r^2$ | Fit Std Err  | F-value      | 95% Confidence Limits |             | P> t    |
|----------------|--------------|--------------|--------------|-----------------------|-------------|---------|
| 0.9774894421   | 0.9710578541 | 0.6393522324 | 347.38879235 |                       |             |         |
| Parm           | Value        | Std Error    | t-value      | 95% Confidence Limits |             | P> t    |
| Bmax           | 15.60975626  | 1.047209334  | 14.90605150  | 13.19488721           | 18.02462531 | 0.00000 |
| Keq            | 1.318338021  | 0.243065369  | 5.423800298  | 0.757828276           | 1.878847767 | 0.00063 |

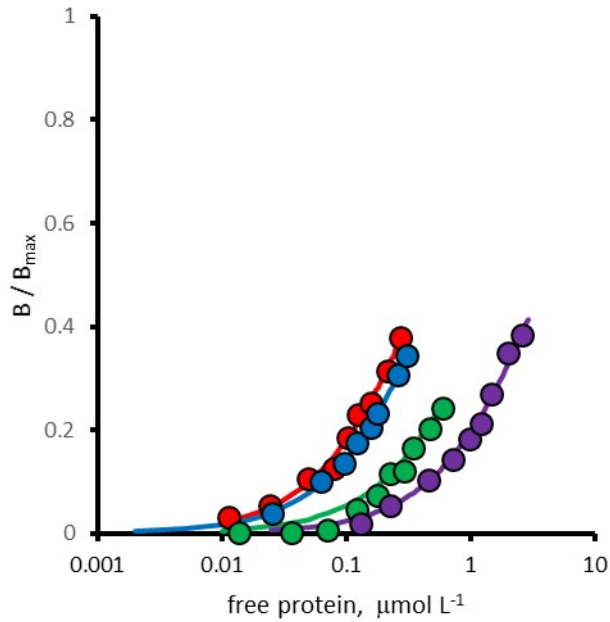

nanoNIP\_NOBE\_RlgG

| r <sup>2</sup> Coef Det | DF Adj r <sup>2</sup> | Fit Std Err  | F-value      | 95% Confidence Limits |             | P> t    |
|-------------------------|-----------------------|--------------|--------------|-----------------------|-------------|---------|
| 0.9914702085            | 0.9886269446          | 0.0470866604 | 813.65311506 |                       |             |         |
| Parm                    | Value                 | Std Error    | t-value      | 95% Confidence Limits |             | P> t    |
| Bmax                    | 4.063085417           | 0.642535017  | 6.323523712  | 2.543731535           | 5.582439299 | 0.00040 |
| Keq                     | 2.197782127           | 0.486359371  | 4.518844006  | 1.047724966           | 3.347839288 | 0.00274 |

nanoNIP\_NOBE\_BlgG

| r <sup>2</sup> Coef Det | DF Adj r <sup>2</sup> | Fit Std Err  | F-value      | 95% Confidence Limits |             | P> t    |
|-------------------------|-----------------------|--------------|--------------|-----------------------|-------------|---------|
| 0.9987210711            | 0.9982094995          | 0.0275383285 | 4685.4257907 |                       |             |         |
| Parm                    | Value                 | Std Error    | t-value      | 95% Confidence Limits |             | P> t    |
| Bmax                    | 6.984587055           | 0.451673546  | 15.46379486  | 5.879381704           | 8.089792407 | 0.00000 |
| Keq                     | 1.699370198           | 0.149829457  | 11.34203003  | 1.332750725           | 2.065989671 | 0.00003 |

nanoNIP\_NOBE\_BSA

| r <sup>2</sup> Coef Det | DF Adj r <sup>2</sup> | Fit Std Err  | F-value      | 95% Confidence Limits |             | P> t    |
|-------------------------|-----------------------|--------------|--------------|-----------------------|-------------|---------|
| 0.9918197508            | 0.9894825367          | 0.0567562986 | 969.96531519 |                       |             |         |
| Parm                    | Value                 | Std Error    | t-value      | 95% Confidence Limits |             | P> t    |
| Bmax                    | 12.58880487           | 6.553907290  | 1.920809117  | -2.52453242           | 27.70214217 | 0.09100 |
| Keq                     | 0.245059118           | 0.143190437  | 1.711420983  | -0.08513862           | 0.575256856 | 0.12537 |

nanoNIP\_NOBE\_LZM

| r <sup>2</sup> Coef Det | DF Adj r <sup>2</sup> | Fit Std Err  | F-value      | 95% Confidence Limits |             | P> t    |
|-------------------------|-----------------------|--------------|--------------|-----------------------|-------------|---------|
| 0.9903943048            | 0.9871924065          | 0.7065239613 | 721.73434806 |                       |             |         |
| Parm                    | Value                 | Std Error    | t-value      | 95% Confidence Limits |             | P> t    |
| Bmax                    | 53.48053553           | 9.114517051  | 5.867621426  | 31.92812751           | 75.03294356 | 0.00062 |
| Keq                     | 0.243597396           | 0.058630192  | 4.154811528  | 0.104959023           | 0.382235768 | 0.00427 |



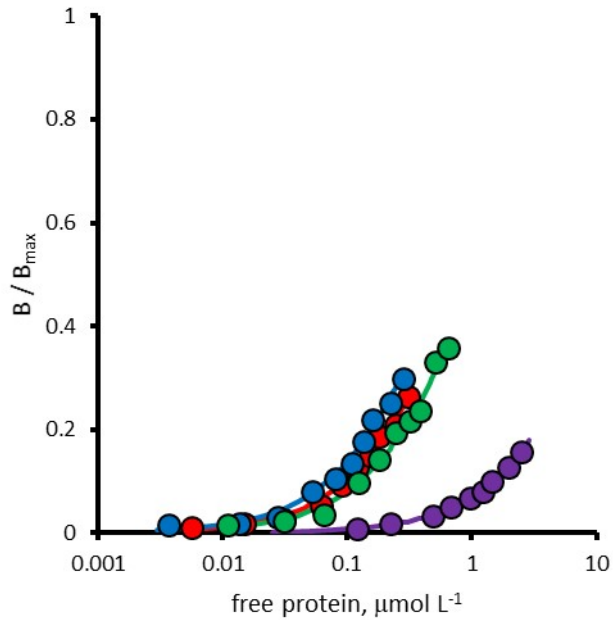

#### nanoNIP\_EDMA\_RlgG

| $r^2$ Coef Det | DF Adj $r^2$ | Fit Std Err  | F-value      |                       |             |
|----------------|--------------|--------------|--------------|-----------------------|-------------|
| 0.9910998682   | 0.9885569734 | 0.0216034335 | 890.86309216 |                       |             |
| Parm           | Value        | Std Error    | t-value      | 95% Confidence Limits |             |
| Bmax           | 2.451135365  | 0.667307443  | 3.673172527  | 0.912321645           | 3.989949085 |
| Keq            | 1.150705736  | 0.391433550  | 2.939721789  | 0.248058352           | 2.053353120 |
|                |              |              |              |                       | P> t        |
|                |              |              |              |                       | 0.00628     |
|                |              |              |              |                       | 0.01872     |

#### nanoNIP\_EDMA\_BlgG

| $r^2$ Coef Det | DF Adj $r^2$ | Fit Std Err  | F-value      |                       |             |
|----------------|--------------|--------------|--------------|-----------------------|-------------|
| 0.9918343034   | 0.9895012473 | 0.0436751247 | 971.70821238 |                       |             |
| Parm           | Value        | Std Error    | t-value      | 95% Confidence Limits |             |
| Bmax           | 4.404778545  | 0.921321305  | 4.780936379  | 2.280207808           | 6.529349282 |
| Keq            | 1.601423805  | 0.438119205  | 3.655223940  | 0.591119109           | 2.611728501 |
|                |              |              |              |                       | P> t        |
|                |              |              |              |                       | 0.00139     |
|                |              |              |              |                       | 0.00645     |

#### nanoNIP\_EDMA\_BSA

| $r^2$ Coef Det | DF Adj $r^2$ | Fit Std Err  | F-value      |                       |             |
|----------------|--------------|--------------|--------------|-----------------------|-------------|
| 0.9899628799   | 0.9870951313 | 0.0926908552 | 789.04137540 |                       |             |
| Parm           | Value        | Std Error    | t-value      | 95% Confidence Limits |             |
| Bmax           | 7.040181259  | 1.325668508  | 5.310664935  | 3.983184202           | 10.09717832 |
| Keq            | 0.887839955  | 0.231876656  | 3.828932034  | 0.353131429           | 1.422548482 |
|                |              |              |              |                       | P> t        |
|                |              |              |              |                       | 0.00072     |
|                |              |              |              |                       | 0.00503     |

#### nanoNIP\_EDMA\_LZM

| $r^2$ Coef Det | DF Adj $r^2$ | Fit Std Err  | F-value      |                       |             |
|----------------|--------------|--------------|--------------|-----------------------|-------------|
| 0.9973423552   | 0.9964564736 | 0.4505003329 | 2626.9110198 |                       |             |
| Parm           | Value        | Std Error    | t-value      | 95% Confidence Limits |             |
| Bmax           | 162.9357339  | 42.77348563  | 3.809269493  | 61.79251263           | 264.0789552 |
| Keq            | 0.075122284  | 0.022401775  | 3.353407660  | 0.022150503           | 0.128094064 |
|                |              |              |              |                       | P> t        |
|                |              |              |              |                       | 0.00663     |
|                |              |              |              |                       | 0.01219     |

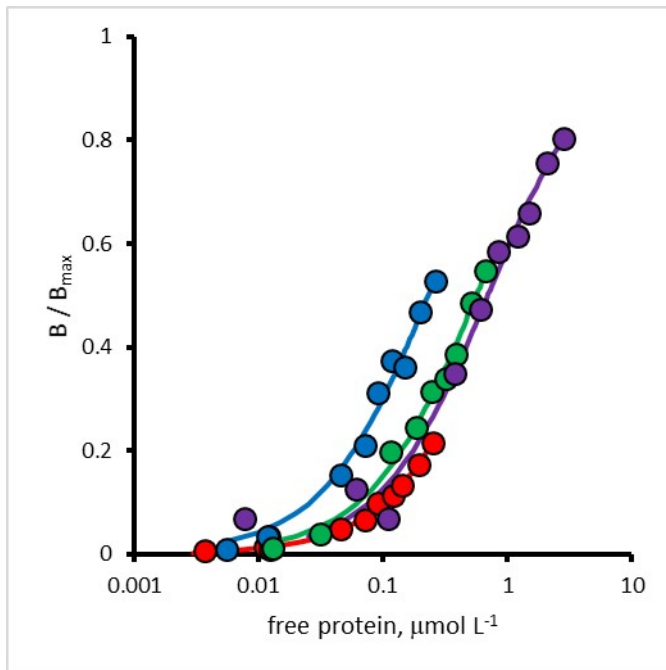

#### nanoNIP\_GDMA\_RIgG

| $r^2$        | Coef Det    | DF | Adj $r^2$    | Fit Std Err  | F-value               |             |         |
|--------------|-------------|----|--------------|--------------|-----------------------|-------------|---------|
| 0.9971194316 |             |    | 0.9962964121 | 0.0419799636 | 2769.2296666          |             |         |
| Parm         | Value       |    | Std Error    | t-value      | 95% Confidence Limits |             | P> t    |
| Bmax         | 10.29288198 |    | 2.060024945  | 4.996484148  | 5.542455946           | 15.04330802 | 0.00106 |
| Keq          | 1.095123381 |    | 0.261738625  | 4.184034287  | 0.491553030           | 1.698693732 | 0.00306 |

#### nanoNIP\_GDMA\_BlgG

| $r^2$        | Coef Det    | DF | Adj $r^2$    | Fit Std Err  | F-value               |             |         |
|--------------|-------------|----|--------------|--------------|-----------------------|-------------|---------|
| 0.9897824381 |             |    | 0.9868631347 | 0.0412233005 | 774.96565061          |             |         |
| Parm         | Value       |    | Std Error    | t-value      | 95% Confidence Limits |             | P> t    |
| Bmax         | 3.389852076 |    | 0.711088070  | 4.767133943  | 1.750080047           | 5.029624104 | 0.00141 |
| Keq          | 1.779035815 |    | 0.503076050  | 3.536315862  | 0.618940365           | 2.939131264 | 0.00766 |

#### nanoNIP\_GDMA\_BSA

| $r^2$        | Coef Det    | DF | Adj $r^2$    | Fit Std Err  | F-value               |             |         |
|--------------|-------------|----|--------------|--------------|-----------------------|-------------|---------|
| 0.9936525051 |             |    | 0.9918389352 | 0.0722714346 | 1252.3397328          |             |         |
| Parm         | Value       |    | Std Error    | t-value      | 95% Confidence Limits |             | P> t    |
| Bmax         | 9.937853368 |    | 2.209129290  | 4.498538594  | 4.843592097           | 15.03211464 | 0.00201 |
| Keq          | 0.556319023 |    | 0.154933782  | 3.590688972  | 0.199041081           | 0.913596965 | 0.00708 |

#### nanoNIP\_GDMA\_LZM

| $r^2$        | Coef Det    | DF | Adj $r^2$    | Fit Std Err  | F-value               |             |         |
|--------------|-------------|----|--------------|--------------|-----------------------|-------------|---------|
| 0.9976828314 |             |    | 0.9970207832 | 0.3358295725 | 3444.4893313          |             |         |
| Parm         | Value       |    | Std Error    | t-value      | 95% Confidence Limits |             | P> t    |
| Bmax         | 31.63808539 |    | 1.292211017  | 24.48368338  | 28.65824145           | 34.61792934 | 0.00000 |
| Keq          | 0.568918263 |    | 0.043635104  | 13.03808641  | 0.468295532           | 0.669540994 | 0.00000 |

3 – Atomic force imaging of nanoMIPs grafted onto glass surfaces at high ionic strength (0.1 mol L<sup>-1</sup> NaCl).

BIS 10 x 10 μm

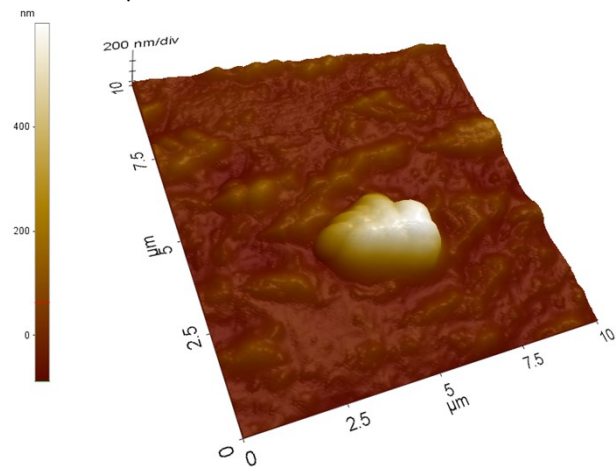

BIS 5 x 5 μm

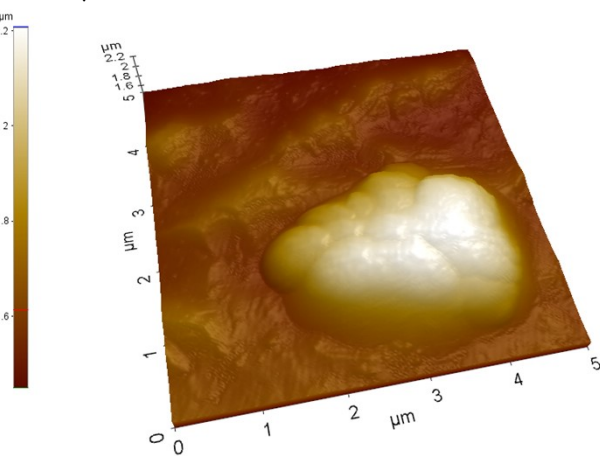

EDAM 10 x 10 μm

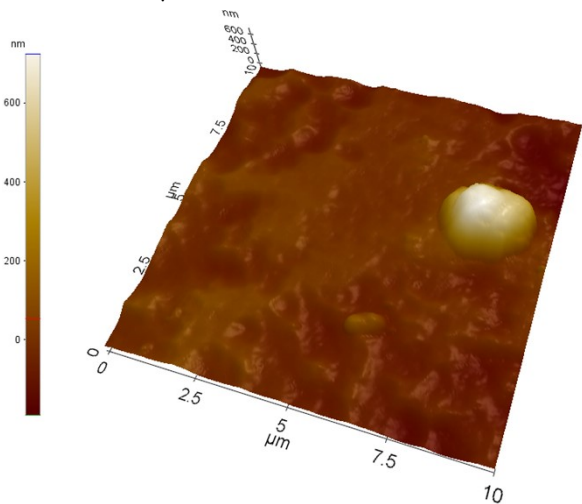

EDAM 3 x 3 μm

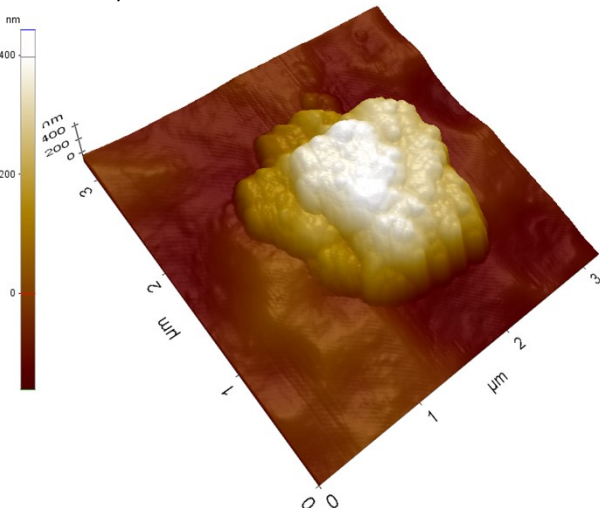

NOBE 5 x 5 μm

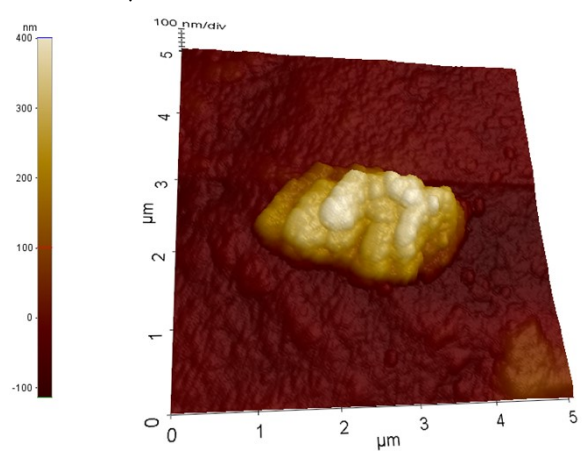

NOBE 3 x 3 μm

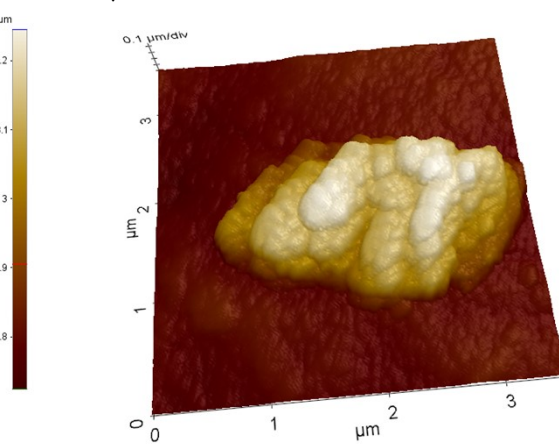

EDMA 1.8 x 1.8  $\mu\text{m}$

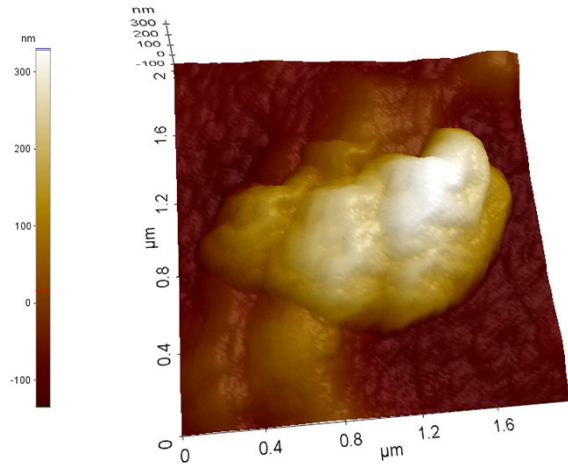

GDMA 5 x 5  $\mu\text{m}$

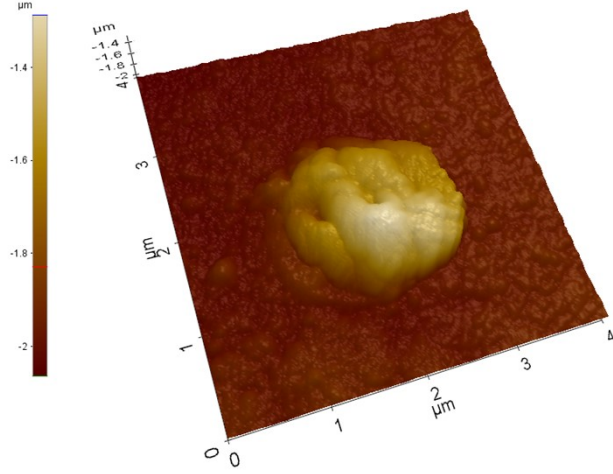

GDMA 3 x 3  $\mu\text{m}$

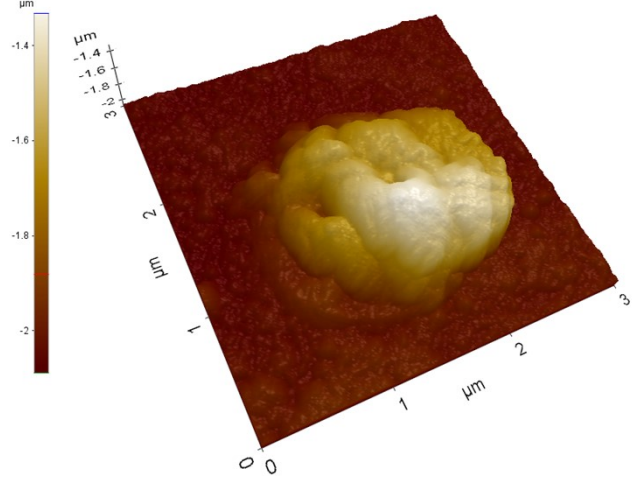

Supplement: d2tb00245k1.pdf [file d2tb00245k1.pdf]
